# Supplementary material for: Graphene coatings for enhanced hemo-compatibility of nitinol stents
Source: Royal Society of Chemistry journal article supplement (doi:10.1039/c2ra23073a), 2012-12-03
Supplement: c2ra23073a.pdf [file c2ra23073a.pdf]

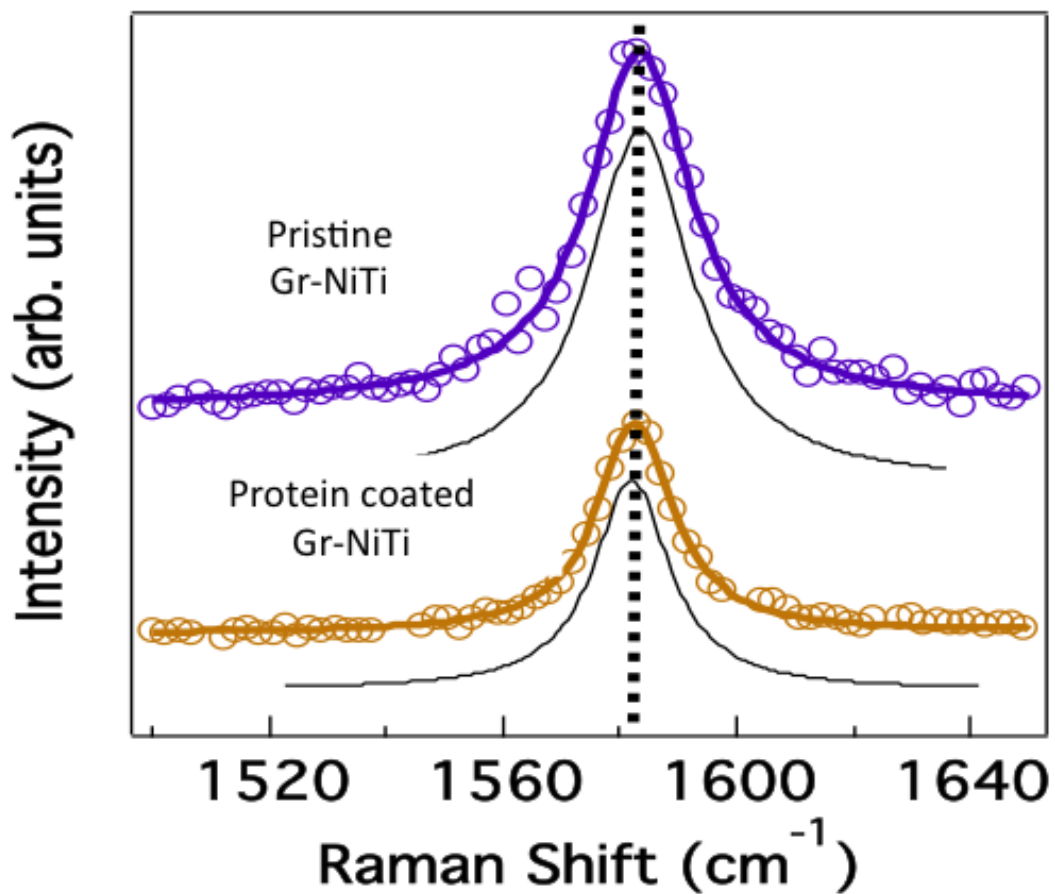

Figure S1: The micro-Raman spectra of bare and fibrinogen-coated graphene. The solid traces represent the results of Lorentzian lineshape data analysis (open circles) which suggests no evidence of a shift in the *G*-band frequency, and hence no charge transfer from the fibrinogen to Gr-NiTi.

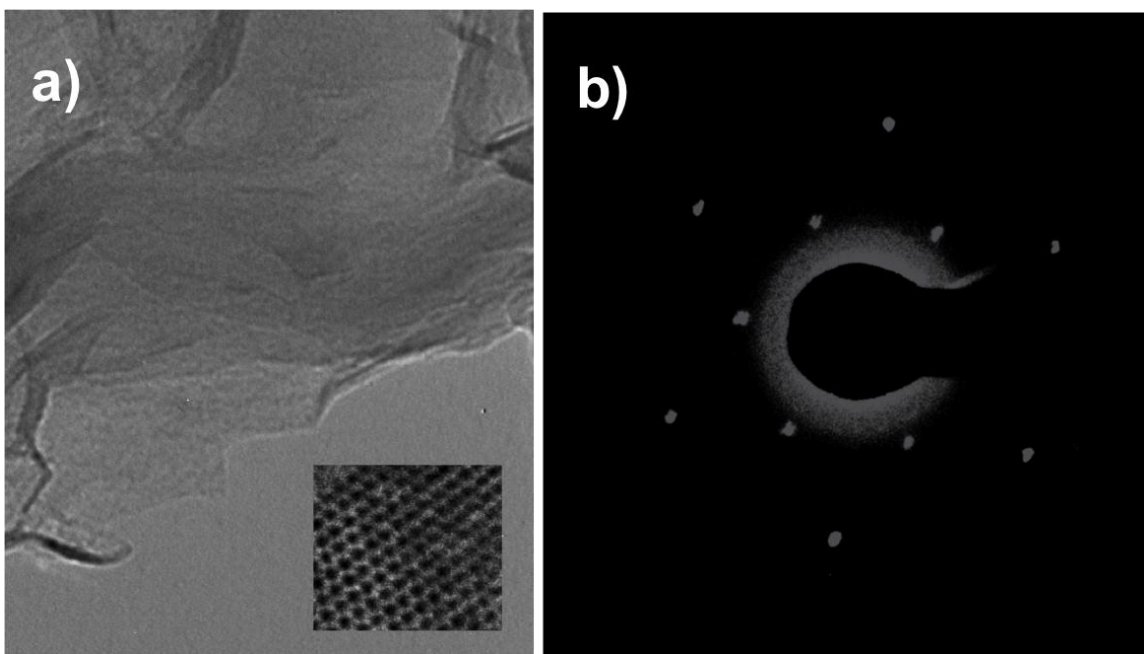

Figure S2: a) Transmission electron micrograph for single-layer graphene grown on Cu substrates. The inset shows high-resolution image with the honey comb lattice of graphene. b) Electron-diffraction pattern conforms that the 1 sccm samples grown on Cu substrates are indeed single-layers.



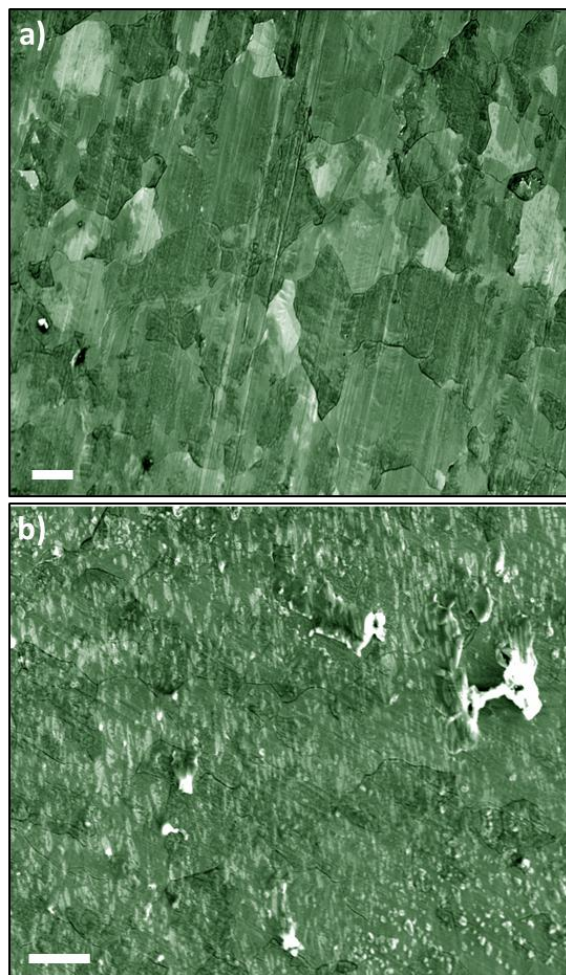

Figure S3: a) SEM image of pristine graphene grown on Ni foils showing that the graphene grain structure is similar to the underlying Ni crystal domains (scale bar: 10  $\mu\text{m}$ ). b) SEM image of albumin/fibrinogen -coated graphene showing complete coverage of protein on the substrate (scale bar: 10  $\mu\text{m}$ ).
